# Supplementary material for: An Mn-doped NiCoP flower-like structure as a highly efficient electrocatalyst for hydrogen evolution reaction in acidic and alkaline solutions with long duration
Source: Royal Society of Chemistry journal article supplement (doi:10.1039/d1nr01913a), 2021-01-01
Supplement: d1nr01913a1.pdf [file d1nr01913a1.pdf]

## Electronic Supplementary Information

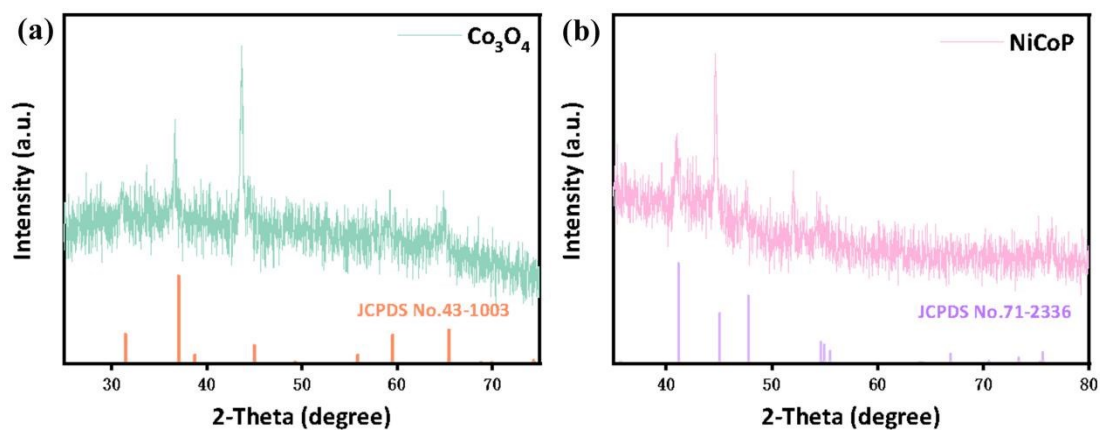

Fig. S1. XRD patterns of (a)  $\text{Co}_3\text{O}_4/\text{NF}$ ; (b)  $\text{NiCoP}/\text{NF}$ .

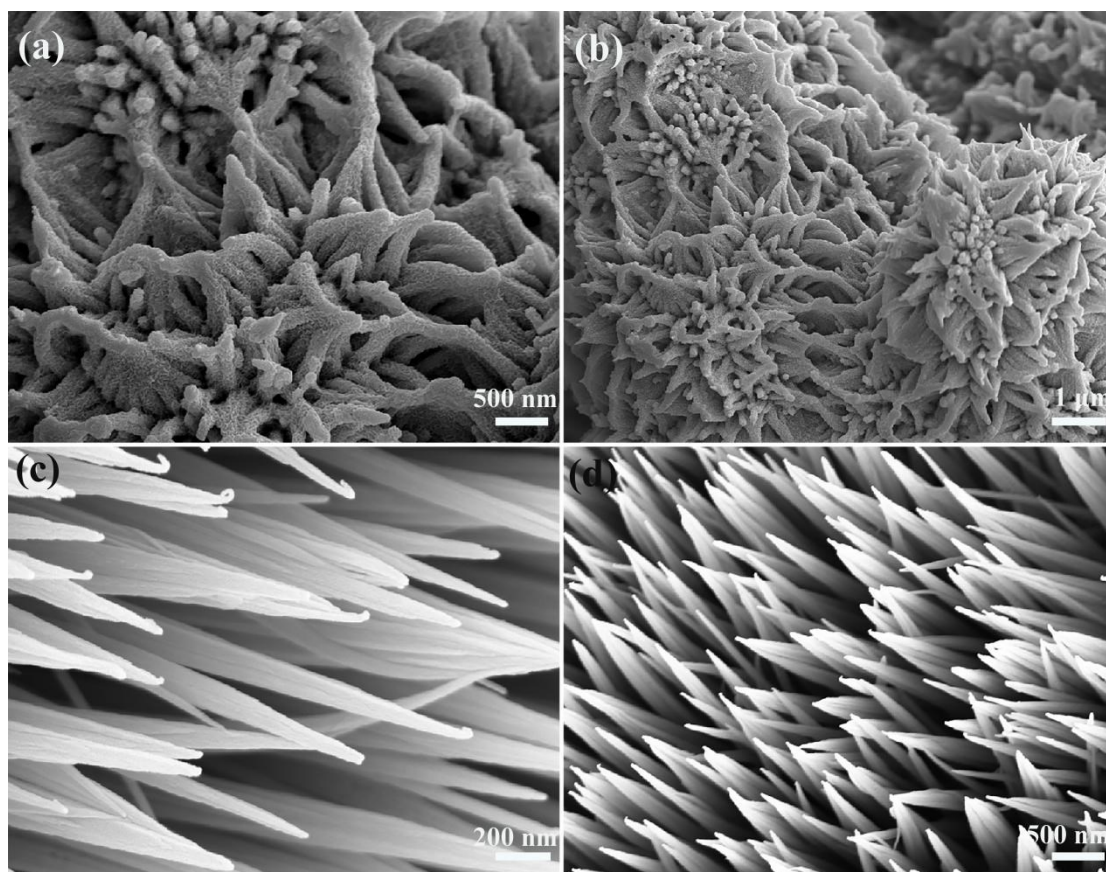

Fig. S2. (a-b) SEM images of  $\text{Co}(\text{OH})_2/\text{NF}$ ; (c-d) SEM images of  $\text{Co}_3\text{O}_4/\text{NF}$

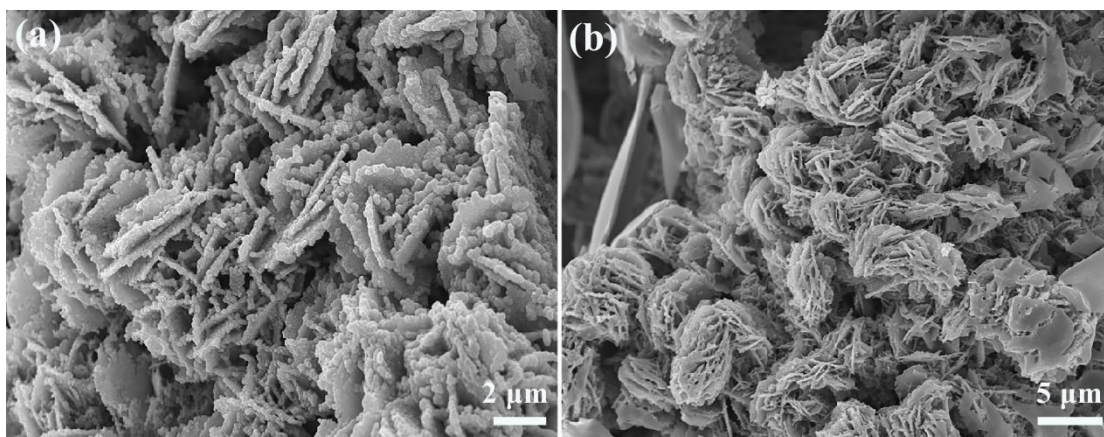

**Fig. S3.** SEM images of Mn-NiCoP/NF after stability test.

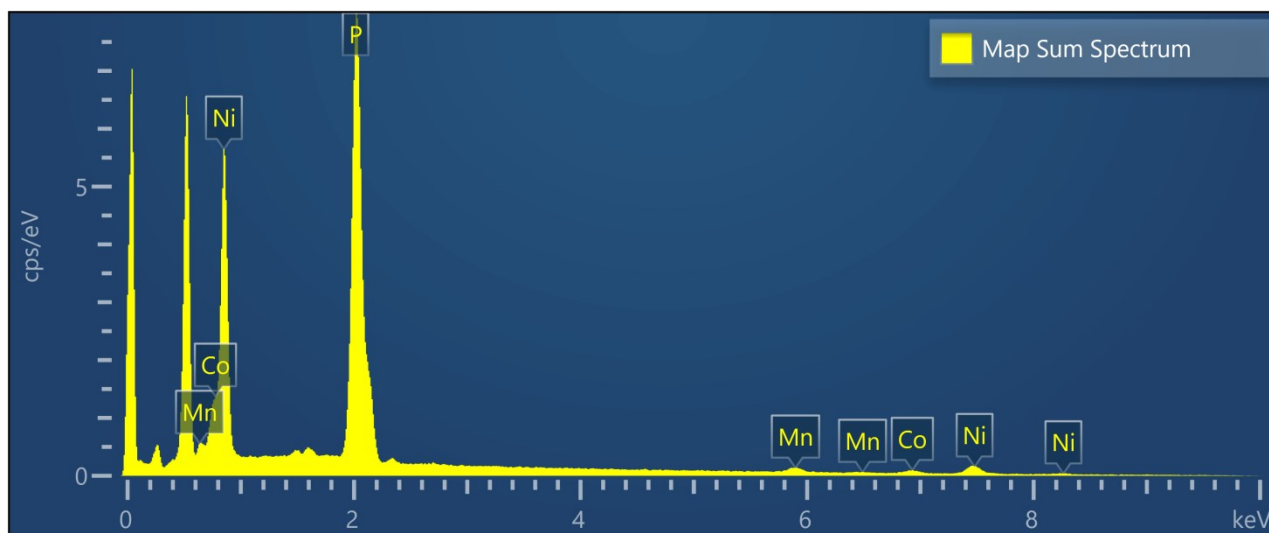

**Fig. S4.** EDS spectrum of Mn-NiCoP/NF.

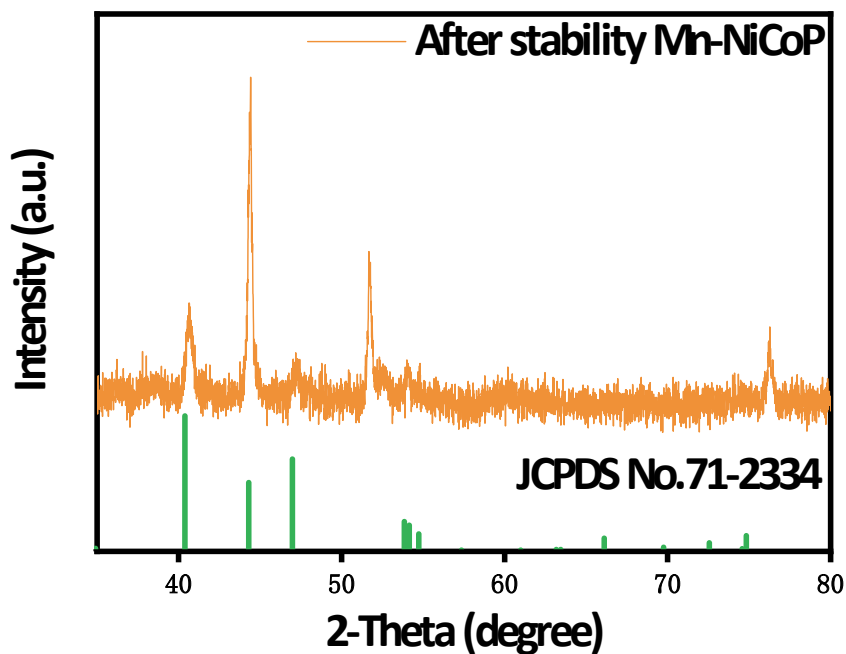

Fig. S5. XRD pattern of Mn-NiCoP/NF after 120h stability measure.

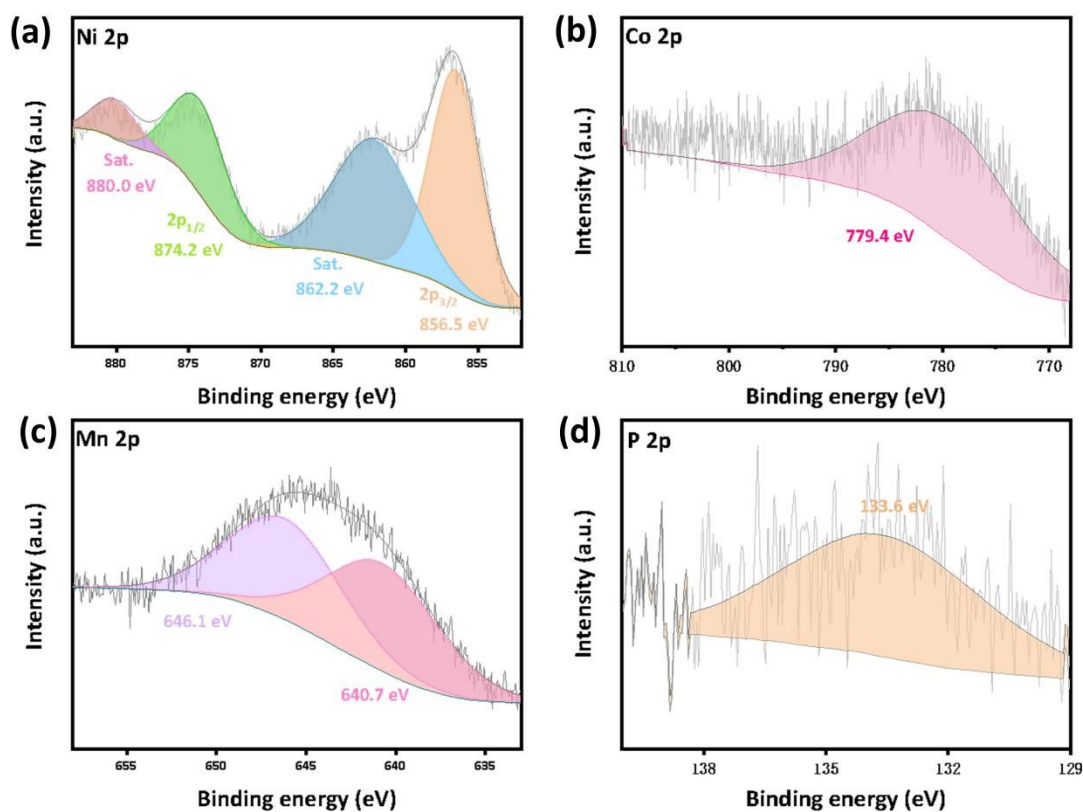

Fig. S6. XPS survey spectra of Mn-NiCoP/NF in (a) Ni 2p region (b) CoP 2p region (c) Mn 2p region and (d) P 2p region after long-term HER test.

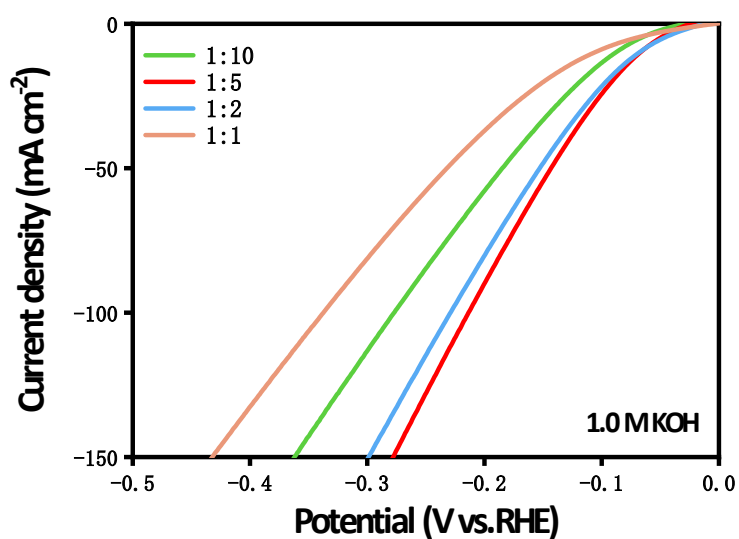

**Fig. S7.** The polarization curves of MnCl<sub>2</sub>/Co(NO<sub>3</sub>)<sub>2</sub> solutions with molar ratios of 1:10, 1:5, 1:2 and 1:1 were tested in 1.0 M KOH solution.

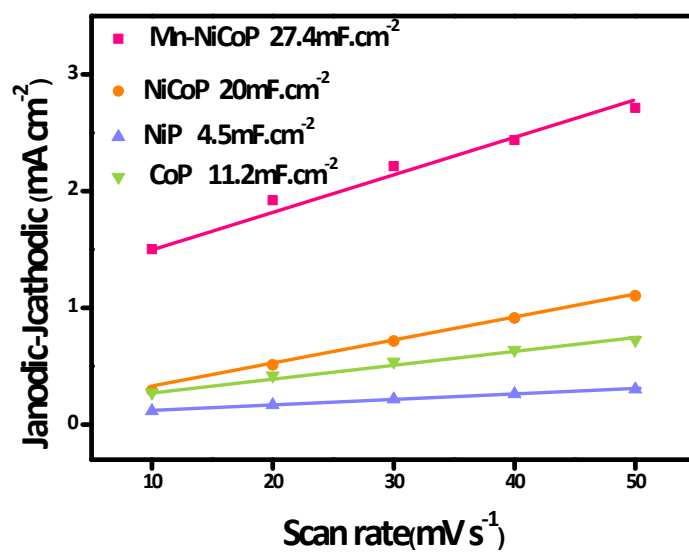

**Fig. S8.** Difference between anodic and cathodic current density plotted against scan rate of Mn-NiCoP, NiCoP, NiP and CoP electrocatalysts.

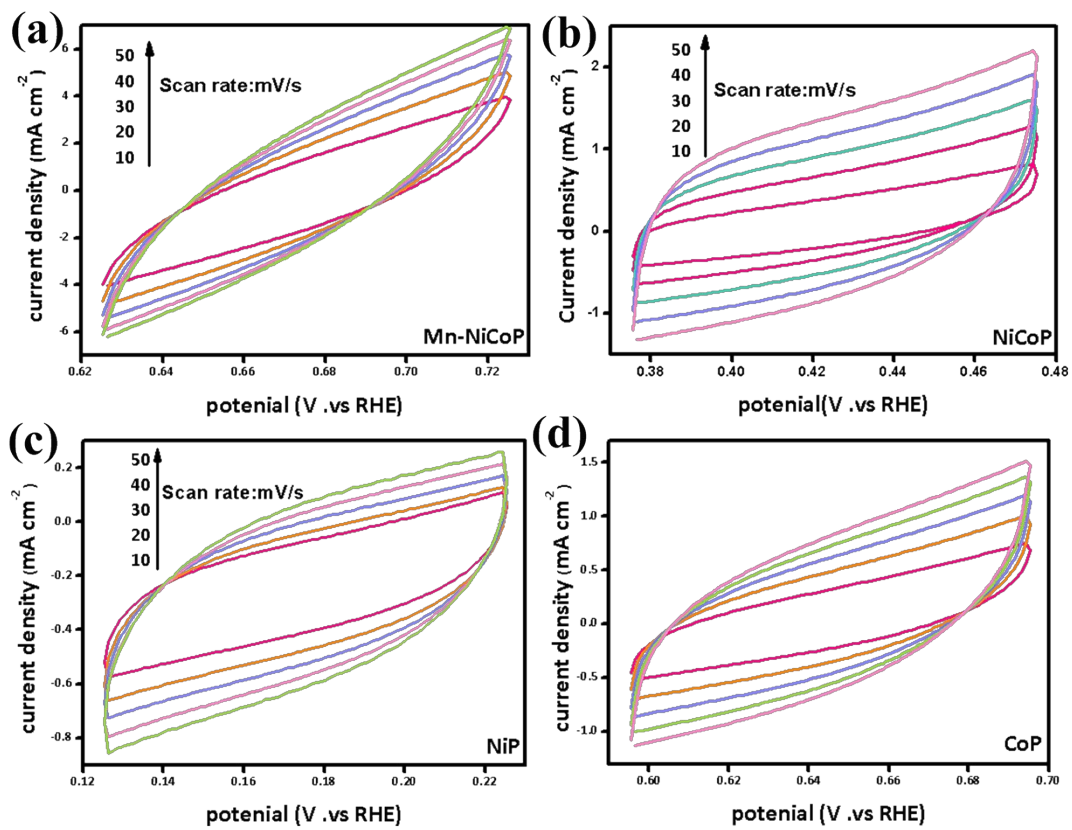

**Fig. S9.** CV images within scan rate of 10~50 mV/s of Mn-NiCoP, NiCoP, NiP and CoP electrocatalysts.
